# Supplementary material for: Exposure to immune stimuli reprograms alveolar macrophages to acquire neutrophil-derived antimicrobial molecules to prevent staphylococcal pneumonia
Source: Research Square preprint supplement (doi:10.21203/rs.3.rs-8361540/v1), 2025-12-22
Supplement: Supplementary file 1 [file 0b62eea77c498d52fd1987ae.docx]

**Supplementary Fig. 1 Exposure to non-lethal MRSA reduces lung injuries during subsequent lethal MRSA infections**. Hematoxylin and eosin (H&E) stained lung histology sections from primary or secondary MRSA-infected mice. Mice were inoculated with phosphate buffer saline (PBS) or a non-lethal dose (106 CFU) of MRSA for 6 days and then challenged with a lethal dose (108 CFU) of MRSA for 48 hours. All inoculations were performed by oropharyngeal aspiration.

**Supplementary Fig. 2 Neutrophils and CCR2-mediated inflammatory monocyte recruitments are insufficient for the LPS-induced immune protection against MRSA infections.** (A) Immunophenotyping analysis of leukocytes in BALF of naive mice (n=4) and mice exposed to LPS via oropharyngeal aspiration for 3 or 6 days (n=4). Cells were stained for AMs using anti-CD11c, anti-CD170, neutrophils (PMNs) using anti-Ly6G, anti-CD11b, and monocytes (MONOs) using anti-Ly6C, anti-CD11b, and analyzed by flow cytometry. (B) Flow cytometric analysis of the percentage of neutrophils in bone marrow and its neutrophil-purified fraction from naive and LPS-exposed mice. Cells were stained with anti-CD45, anti-Ly6G, and anti-CD11b. The percent of neutrophils was determined by gating against unstained cells. (C) Bacterial burden in lungs of mice when injected with PBS (naive), adoptively transferred with purified neutrophils from naive mice (naive->naive), or adoptively transferred with purified neutrophils from LPS-exposed mice (LPS->naive) one hour prior to MRSA challenges. (D) Survival curves of MRSA-infected WT (n≥8) and CCR2 KO (n≥8) mice when mice were injected with PBS (naive) or LPS via oropharyngeal aspiration for 6 days prior to infections. (E) Bacterial burden in lungs of MRSA-infected naive WT mice (n=10), naive CCR2 KO mice (n=9), LPS-exposed WT mice (n=11), and LPS-exposed CCR2 KO mice (n=9). (F, G) Monocyte (F) and alveolar macrophage counts (G) in lungs of naive WT mice (n=6), LPS-exposed WT mice (n=8), and LPS-exposed CCR2 KO mice (n=8). Graphs representing the mean from at least two independent experiments ± SEM. Statistical analysis was performed by Two-way ANOVA for panels A and E with Holm-Sidak’s post-test for multiple comparisons and One-way ANOVA with Holm-Sidak’s post-test for panels C, F, and G. *P* value: *<0.05; **< 0.01, ***< 0.001, ****< 0.0001, and ns: not statistically significant.

**Supplementary Fig. 3 Expression of inflammatory genes is differentially changed in lungs of LPS-exposed mice relative to unexposed mice during MRSA infections.** (A) qPCR of *Tnfα*, *Il1β*, *Il6,* and *Il10* transcript levels in lungs of uninfected mice when mice were exposed to LPS for 6 days or left untreated (naive). (B) Transcript levels of *Marco*, *Anpep*, and *Itgax* in lungs of uninfected mice (n=3), MRSA-infected mice pre-exposed to LPS for 6 days (n=3), or MRSA-infected naive mice (n=3). Graphs represent the mean of normalized counts ± SD from the NanoString data. (C) Expression of selected genes from the NanoString data presented as log2(fold change) in lungs of MRSA-infected naive mice or mice exposed to LPS for 6 days relative to lungs from uninfected mice. (D) Levels of indicated inflammatory mediator in supernatants of lung signal-cell suspensions from uninfected naive mice, uninfected LPS pre-exposed mice, MRSA-infected naive mice, and MRSA-infected LPS pre-exposed mice. Graphs represent the mean of n≥3 biological replicates ± SD. *P* values were calculated using the Mann-Whitney test for panel A, One-way ANOVA followed by a Holm-Sidak’s multiple comparisons test for panel B, or Two-way ANOVA followed by a Holm-Sidak’s multiple comparisons test for panel D. *P* value: *<0.05; **< 0.01, ***< 0.001, ****< 0.0001, and ns: not statistically significant.

**Supplementary Fig. 4 LPS exposure stimulates AM self-renewal and MPO uptake.** (A) Representative cytospin image of BALF cells from uninfected naive mice, uninfected LPS pre-exposed mice, MRSA-infected naive mice, or MRSA-infected LPS pre-exposed mice. Scale bar represents 20 µm. (B) Representative confocal microscopy images or Mono and Binucleated AMs from LPS pre-exposed mice for 6 days and subsequently infected with MRSA for 48 hours. Cells were extracted from the lungs ex vivo and stained with DAPI (gray), CD169 (green), and CD11c (red). Scale bar represents 10 µm.

(C) Absolute AM counts in lungs of MRSA-infected mice when mice were left untreated (naive) or pre-exposed to LPS for 6 days. (D) Representative flow cytometry histogram of blood monocytes from mice injected with control PBS or Rhodamine liposomes via the tail vein. Cells were stained with monocyte markers (CD45, CD11b, and Ly6C). The percent of monocyte-positive liposomes was determined by gating against monocytes from PBS-injected mice. (E) Mean fluorescence intensity of GFP in lung cells when naive or LPS pre-exposed mice infected with MRSA-GFP for 48 hours. (F) The expression level of *Mpo* was quantified by qPCR and normalized relative to *Gapdh*. The ΔΔCt was calculated relative to the average ΔCt of MRSA-infected naïve mice. (G) Quantification of *Elane* transcripts in lungs of MRSA-infected naive mice (n=3) and MRSA-infected LPS pre-exposed mice (n=3) from NanoString data. (H, I) Representative confocal microscopy images (H) and quantification (I) of MPO levels in AMs of LPS pre-exposed mice when mice were infected with MRSA-GFP for 6, 24, or 48 hours. MFI of MPO is presented in violin plots from at least 96 AMs for each condition from n≥3 mice. Scale bar represents 5 µm. Graphs represent the mean of n≥3 biological replicates ± SD. *P* values were calculated using the Mann-Whitney test for panels C, E, F, and G or One-way ANOVA followed by a Holm-Sidak’s multiple comparisons test for panel I. *P* value: *<0.05, ***< 0.001, ****< 0.0001.

**Supplementary Fig. 5 Bcl-xL and MerTK inhibitors do not cause lung toxicity to uninfected mice or MRSA-infected AM cell death in LPS-exposed mice.** (A) H&E-stained lung histological sections from mice treated with DMSO control, Bcl-xL inhibitor (A-1331852), or MerTK inhibitor (UNC2025). (B) Representative confocal microscopy images of AMs extracted from lungs of LPS-exposed mice for 6 days, when mice were treated with DMSO control or Bcl-xL inhibitor, or MerTK inhibitor before being infected with MRSA-GFP (green) for 48 hours. Cells were stained with DAPI (gray), anti-cleaved Caspase 3 (red), and anti-CD169 (magenta) Scale bar represents 5 µm. (C) Representative confocal microscopy images of cleaved Caspase 3-positive cells present in lungs of LPS-exposed mice, treated with Bcl-xL or MerTK inhibitors, and infected with MRSA. Scale bar represents 5 µm.
